# Supplementary material for: Species packing and the latitudinal gradient in beta-diversity
Source: bioRxiv or medRxiv preprint supplement (doi:10.1101/2020.07.14.200006), 2022-04-30
Supplement: Supplementary file [file media-1.pdf]

# 1 Species packing and the latitudinal gradient in local beta-diversity

2 Ke Cao, Richard Condit, Xiangcheng Mi<sup>1</sup>, Lei Chen, Haibao Ren, Wubing Xu, David F. R. P.  
3 Burslem, Chunrong Cai, Min Cao, Li-Wan Chang, Chengjin Chu, Fuxin Cui, Hu Du, Sisira  
4 Ediriweera, C.S.V. Gunatilleke, I.U.A.N. Gunatilleke, Zhanqing Hao, Guangze Jin, Jinbo Li,  
5 Buhang Li, Yide Li, Yankun Liu, Hongwei Ni, Michael J. O'Brien, Xiujuan Qiao, Guochun  
6 Shen, Songyan Tian, Xihua Wang, Han Xu, Yaozhan Xu, Libing Yang, Sandra L. Yap, Juyi  
7 Lian, Wanhui Ye, Mingjian Yu, Sheng-Hsin Su, Chia-Hao Chang-Yang, Yili Guo, Xiankun Li,  
8 Fuping Zeng, Daoguang Zhu, Li Zhu, I-Fang Sun, Keping Ma, Jens-Christian Svenning

9

## 10 Electronic supplementary material

11

### 12 S1. Undersampling correction methods for $\beta$ -Shannon diversity

13

14 Species accumulation curves have been applied to rarefy and extrapolate species richness with  
15 respect to sample size [1]. Chao *et al.* [2, 3] extended the species accumulation curve to the  
16 diversity accumulation curve, which corrects for the undersampling bias by asymptotically  
17 estimating the real  $\alpha$ - and  $\gamma$ -Shannon diversity ( ${}^1\hat{D}(\infty)$ ) of samples in a region. The  ${}^1\hat{D}(\infty)$   
18 ( $q=1$ ,  $q$  is the diversity order) is calculated as:

$$19 \quad {}^1\hat{D}(\infty) = \exp[\hat{H}(\infty)] \quad (1)$$

20  $\hat{H}(\infty)$  is a nearly unbiased estimator of Shannon entropy [2]:

$$21 \quad \hat{H}(\infty) = \sum_{k=1}^{n-1} \frac{1}{k} \sum_{1 \leq X_i \leq n-1} \frac{X_i}{n} \frac{\binom{n-X_i}{k}}{\binom{n-1}{k}} + \frac{f_1}{n} (1-A)^{-n+1} \left\{ -\log(A) - \sum_{r=1}^{n-1} \frac{1}{r} (1-A)^r \right\}$$

22 (2)

23 where  $X_i$  is the species frequency of species  $i$ ,  $k$  is the size of a random sample from the  
24 observed community,  $f_1$  is the number of singletons (i.e., species represented by only one

25 individual in the observed sample), and  $f_2$  is the number of doubletons (i.e., species  
26 represented by only two individuals in the observed sample).  $A$  is the estimated mean relative  
27 frequency of the singletons in the sample:

$$28 \quad A = 2f_2 / [(n - 1)f_1 + 2f_2] \quad (3)$$

29

30

## 31 **References**

- 32 1. Colwell R.K., Chao A., Gotelli N.J., Lin S.-Y., Mao C.X., Chazdon R.L., Longino J.T.  
33 2012 Models and estimators linking individual-based and sample-based rarefaction,  
34 extrapolation and comparison of assemblages. *J Plant Ecol* **5**(1), 3-21. (doi:10.1093/jpe/rtr044).
- 35 2. Chao A., Wang Y.T., Jost L. 2013 Entropy and the species accumulation curve: a novel  
36 entropy estimator via discovery rates of new species. *Methods Ecol Evol* **4**(11), 1091-1100.  
37 (doi:10.1111/2041-210x.12108).
- 38 3. Chao A., Gotelli N.J., Hsieh T.C., Sander E.L., Ma K.H., Colwell R.K., Ellison A.M. 2014  
39 Rarefaction and extrapolation with Hill numbers: a framework for sampling and estimation in  
40 species diversity studies. *Ecol Monogr* **84**(1), 45-67. (doi:10.1890/13-0133.1).
- 41 4. Legendre P., De Caceres M. 2013 Beta diversity as the variance of community data:  
42 dissimilarity coefficients and partitioning. *Ecol Lett* **16**(8), 951-963. (doi:10.1111/ele.12141).
- 43 5. Chao A., Chazdon R.L., Colwell R.K., Shen T.-J. 2005 A new statistical approach for  
44 assessing similarity of species composition with incidence and abundance data. *Ecol Lett* **8**(2),  
45 148-159. (doi:10.1111/j.1461-0248.2004.00707.x).

46

47 **Supplementary Table S1:** Basic information of 21 forest dynamic plots.

| Plot name     | Area<br>(ha) | Latitude<br>(°N) | Longitude<br>(°E) | Mean<br>elevation<br>(m) | Elevation<br>range (m) | Gamma-<br>diversity | Number<br>of stems |
|---------------|--------------|------------------|-------------------|--------------------------|------------------------|---------------------|--------------------|
| Pasoh         | 50           | 2.98             | 102.31            | 80                       | 24                     | 818                 | 335400             |
| Danum Valley  | 50           | 5.1              | 117.69            | 54.1                     | 101.12                 | 642                 | 234916             |
| Sinharaja     | 25           | 6.4              | 80.4              | 499.5                    | 151                    | 239                 | 250131             |
| Palanan       | 16           | 17.04            | 122.38            | 111                      | 55                     | 415                 | 66000              |
| Jianfengling  | 60           | 18.73            | 108.9             | 932                      | 150.4                  | 290                 | 439676             |
| Xishuangbanna | 20           | 21.6             | 101.57            | 765.1                    | 159.87                 | 467                 | 95834              |
| Nonggang      | 15           | 22.42            | 106.95            | 260                      | 190                    | 223                 | 67870              |
| Heishiding    | 50           | 22.7             | 111.99            | 568.8                    | 263                    | 236                 | 264391             |
| Dinghushan    | 20           | 23.17            | 112.52            | 339                      | 240                    | 195                 | 71617              |
| Lienhuachih   | 25           | 23.91            | 120.88            | 765.4                    | 178                    | 144                 | 153268             |
| Chebaling     | 20           | 24.72            | 114.22            | 488                      | 131                    | 222                 | 86517              |
| Fushan        | 25           | 24.76            | 121.56            | 675.3                    | 133                    | 110                 | 114500             |
| Mulun         | 25           | 25.13            | 108               | 547                      | 208.8                  | 254                 | 144679             |
| Gutianshan    | 24           | 29.25            | 118.12            | 580.6                    | 268.6                  | 159                 | 140700             |
| Badagongshan  | 25           | 29.77            | 110.09            | 1414                     | 101                    | 241                 | 186556             |
| Tiantongshan  | 20           | 29.81            | 121.79            | 447.25                   | 298.63                 | 152                 | 115536             |
| Donglingshan  | 20           | 40               | 115.43            | 1395                     | 219.3                  | 53                  | 52136              |
| Changbaishan  | 25           | 42.22            | 128.53            | 801.5                    | 17.7                   | 52                  | 38902              |
| Muling        | 25           | 43.95            | 130.07            | 719.5                    | 123                    | 57                  | 63877              |
| Fenglin       | 30           | 48.08            | 129.12            | 439                      | 66                     | 46                  | 94920              |
| Daxinganling  | 25           | 51.82            | 122.98            | 896.7                    | 115.3                  | 18                  | 126532             |

49 **Supplementary Table S2:** The results of simple linear regression models for beta-diversity  
 50 across grain sizes in figure S2a-b.

| <b>Explanatory variables</b>     | <b>Grain size</b> | <b>Coefficients</b> | <b>Standard error</b> | <b>t-value</b> | <b>p-value</b> | <b>R-square</b> |
|----------------------------------|-------------------|---------------------|-----------------------|----------------|----------------|-----------------|
| <b>Adjusted latitude</b>         | 10m × 10m         | -0.024              | 0.01                  | -2.59          | 0.02           | 0.26            |
|                                  | 20m × 20m         | -0.015              | 0.01                  | -2.01          | 0.06           | 0.18            |
|                                  | 50m × 50m         | -0.0087             | 0.01                  | -1.86          | 0.08           | 0.15            |
| <b>Topographic heterogeneity</b> | 10m × 10m         | 3.62                | 1.65                  | 2.19           | 0.04           | 0.20            |
|                                  | 20m × 20m         | 4.00                | 1.33                  | 3.02           | 0.007          | 0.32            |
|                                  | 50m × 50m         | 4.63                | 1.08                  | 4.28           | <0.001         | 0.49            |

51

52

53

54

55

56

57

58

59

60

61

62

63

64

65

66

67

68

69

70

71

72

73

74 **Supplementary Table S3:** The results of simple regression models for niche specialization and  
 75 marginality against adjusted latitude in Figure S6a and S6c.

| <b>Response variables</b>   | <b>Grain size</b> | <b>Coefficients</b> | <b>Standard error</b> | <b>t-value</b> | <b>p-value</b> | <b>R-square</b> |       |
|-----------------------------|-------------------|---------------------|-----------------------|----------------|----------------|-----------------|-------|
| <b>Niche specialization</b> | 10m               | ×                   | -0.0057               | 0.0027         | -2.10          | 0.049           | 0.19  |
|                             | 10m               |                     |                       |                |                |                 |       |
|                             | 20m               | ×                   | -0.0056               | 0.0030         | -1.88          | 0.076           | 0.16  |
|                             | 20m               |                     |                       |                |                |                 |       |
| <b>Niche marginality</b>    | 50m               | ×                   | -0.0065               | 0.0027         | -2.38          | 0.028           | 0.23  |
|                             | 50m               |                     |                       |                |                |                 |       |
|                             | 10m               | ×                   | -0.0033               | 0.0015         | -2.15          | 0.044           | 0.20  |
|                             | 10m               |                     |                       |                |                |                 |       |
|                             | 20m               | ×                   | -0.0022               | 0.0014         | -1.55          | 0.14            | 0.11  |
|                             | 20m               |                     |                       |                |                |                 |       |
|                             | 50m               | ×                   | -0.0031               | 0.0015         | -2.04          | 0.055           | 0.055 |
|                             | 50m               |                     |                       |                |                |                 |       |

76

77

78

79

80

81

82

83

84

85

86

87

88

89

90

91

92

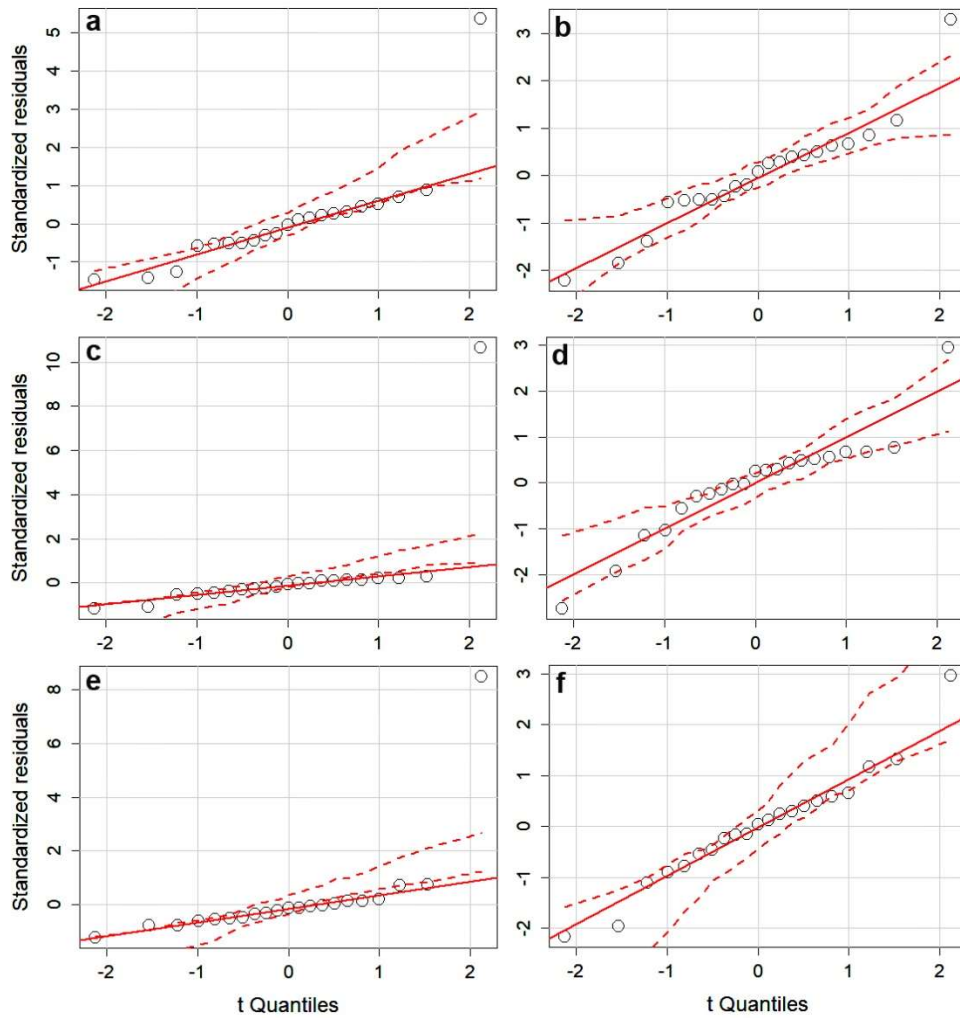

93

94 **Supplementary Figure S1. QQ-plot of residuals from the linear models (niche**

95 **specialization ~ latitude) before (a, c, e) and after (b, d, f) Box-Cox transformation of**

96 **niche specialization at grain size 10m × 10m (a, b), 20m × 20m (c, d) and 50 m × 50**

97 **m (e, f).**

98

99

100

101

102

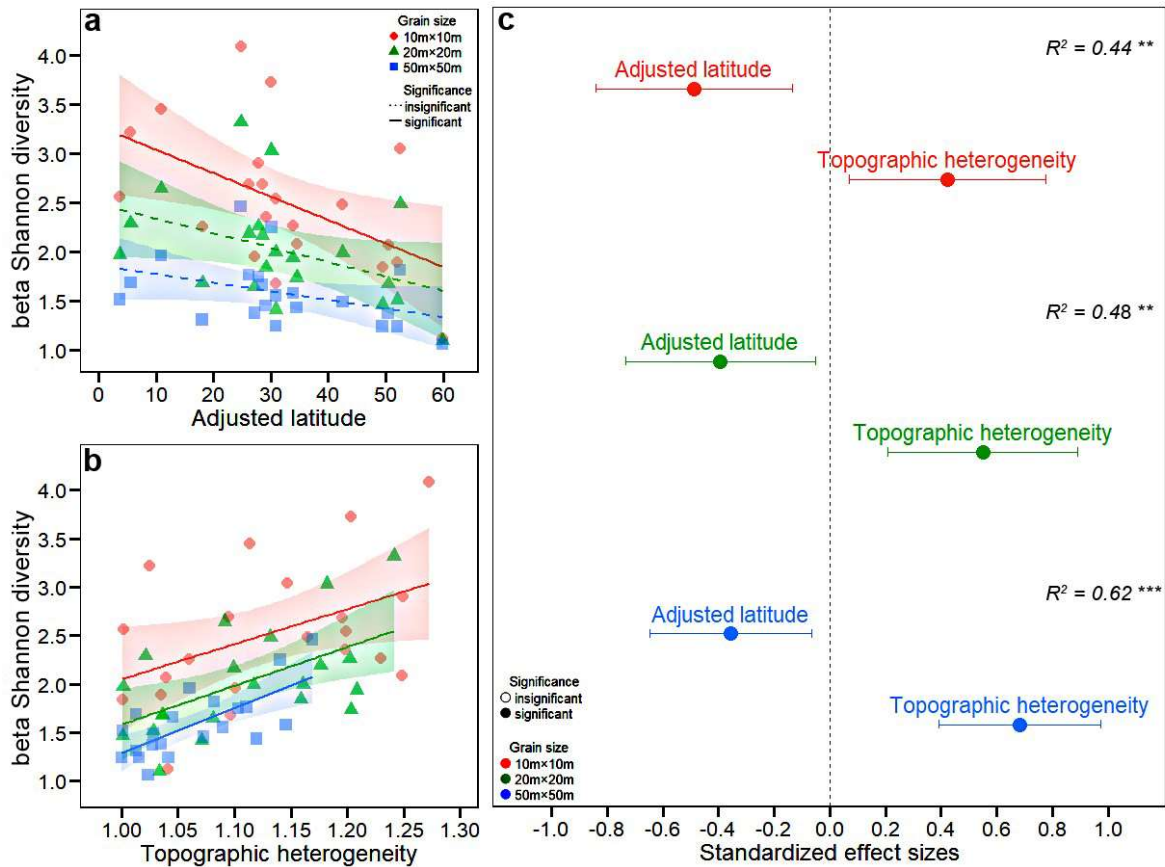

103

104

105

106

107

108

109

110

111

112

113

114

115

**Supplementary Figure S2. Relationship of beta-diversity (measured corrected beta-Shannon diversity) and adjusted latitude (a), and local topographic heterogeneity (b) and their effect sizes (c) across grain sizes.** In each panel, different colours of points and lines represent grain sizes. In panels a and b, solid and dashed lines indicate significant and insignificant linear correlations (significance level,  $\alpha = 0.05$ ), respectively, and the shaded areas represent the 95% confidence intervals of the predictions (electronic supplementary material, table S2). In panel c, points represent the standardized effect sizes of explanatory variables that are significantly (solid circles) and non-significantly (open circles) different from zero, respectively. The significance level of the total  $R^2$  are  $\alpha < 0.001$ , ‘\*\*\*’;  $\alpha < 0.01$ , ‘\*\*’;  $\alpha < 0.05$  ‘\*’.

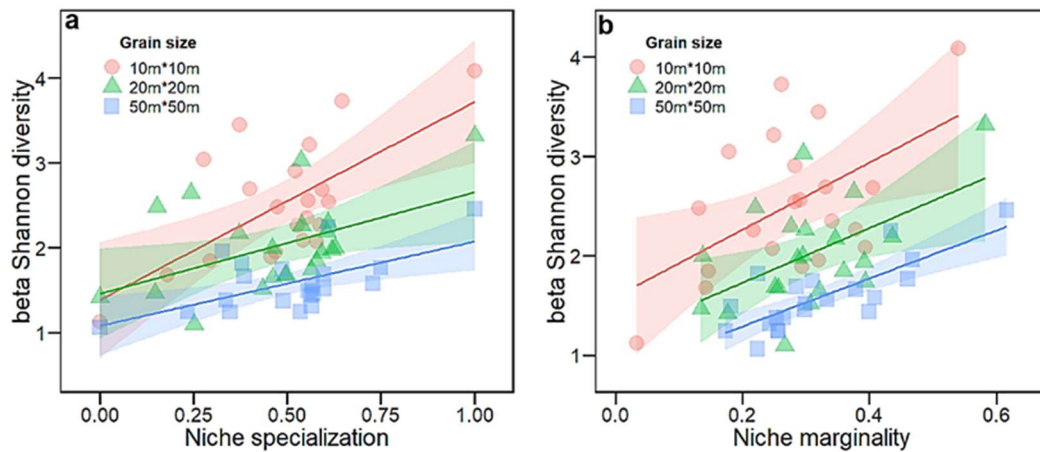

116

117 **Supplementary Figure S3. The relationship of beta-diversity (measured by the corrected**

118 **beta-Shannon diversity) with (a) community-level niche specialization, and (b)**

119 **community-level niche marginality across grain sizes.** In each panel, different colours of

120 points and lines represent grain sizes. In panels a and b, solid and dashed lines indicate

121 significant and non-significant linear correlations (significance level,  $\alpha = 0.05$ ), respectively,

122 and shaded areas represent the 95% confidence interval of the predictions. In panel a, the niche

123 specialization was Box-Cox transformed, and then was rescaled to the range [0, 1].

124

125

126

127

128

129

130

131

132

133

134



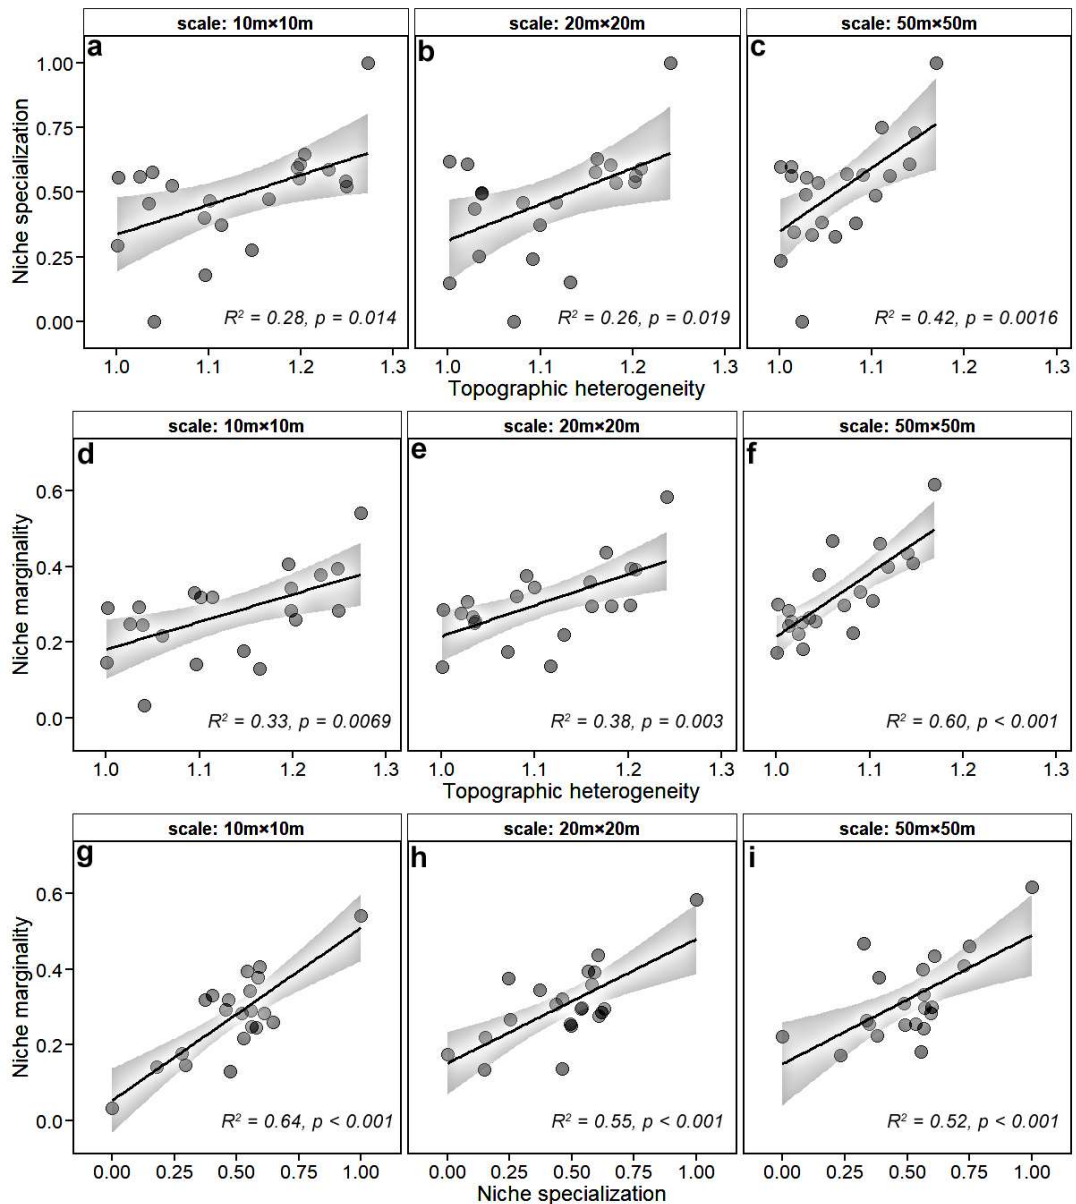

135

136 **Supplementary Figure S4. Relationships between topographic heterogeneity, community-**

137 **level niche specialization and niche marginality across grain sizes (a, d, and g: 10 m × 10**

138 **m; b, e, and h: 20 m × 20 m; c, f, and i: 50 m × 50 m). The niche specialization was**

139 **transformed into normality using a Box-Cox transformation, and then was rescaled to the range**

140 **in [0, 1] with the min-max normalization. Topographic heterogeneity was quantified as surface:**

141 **Planimetric area ratio.**

142

143

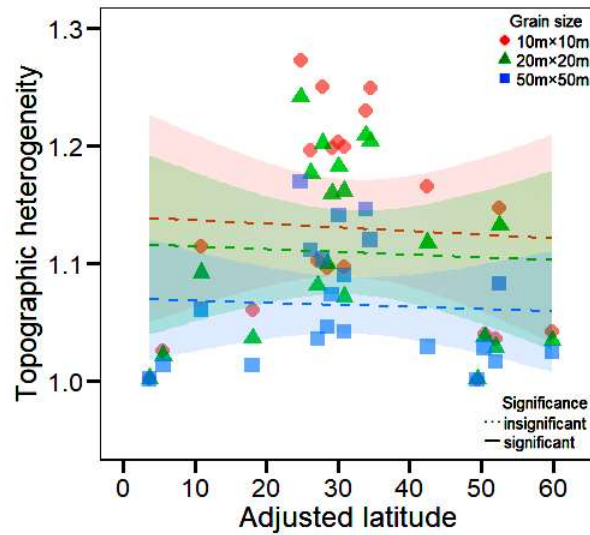

144

145 **Supplementary Figure S5. The linear relationship between topographic heterogeneity**  
 146 **(quantified by the surface to planimetric area ratio) and adjusted latitude across grain**  
 147 **sizes (10 m × 10 m, 20 m × 20 m and 50 m × 50 m).** Dashed lines indicate insignificant  
 148 linear correlations (significance level,  $\alpha = 0.05$ ), and different colours of points and lines  
 149 represent grain sizes.

150

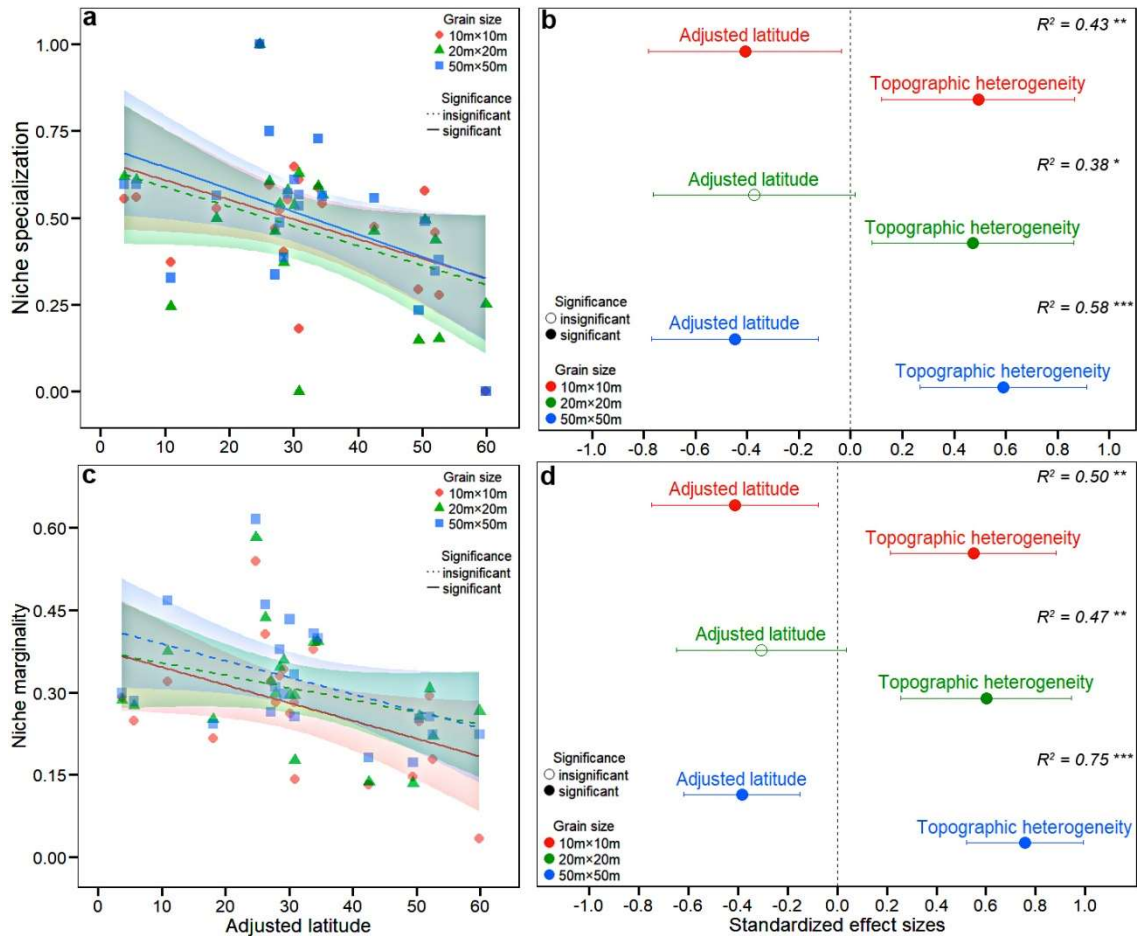

151

152 **Supplementary Figure S6. The relationships of community-level niche specialization (a**

153 **and b) and marginality (c and d) with adjusted latitude and local topographic**

154 **heterogeneity across grain sizes. Community-level niche specialization was Box-Cox**

155 **transformed and was subsequently scaled to the range [0, 1] for comparison across grain sizes.**

156 **In each panel, different colours of points and lines represent grain sizes. In panels a and c,**

157 **solid and dashed lines indicate significant and non-significant linear correlations ( $\alpha = 0.05$ ),**

158 **respectively, and shaded areas represent the 95% confidence intervals of the predictions**

159 **(electronic supplementary material, table S4). In panels b and d, points represent the**

160 **standardized effect sizes of explanatory variables that are significantly (solid circles) and non-**

161 **significantly (open circles) different from zero, respectively. The significance level of the**

162 **total  $R^2$  are  $\alpha < 0.001$ , ‘\*\*\*’;  $\alpha < 0.01$ , ‘\*\*’;  $\alpha < 0.05$  ‘\*’.**

163
